# Supplementary material for: Metabolic reprogramming and membrane glycan remodeling as potential drivers of zebrafish heart regeneration
Source: Springer Nature journal article supplement (doi:10.1038/s42003-022-04328-2), 2022-12-13
Supplement: MOESM2 [file 42003_2022_4328_MOESM2_ESM.pdf]

## Supplementary information

### Metabolic reprogramming and membrane glycan remodeling as potential drivers of zebrafish heart regeneration

*Renza Spelat<sup>1,2,#</sup>, Federico Ferro<sup>1,3,#</sup>, Paolo Contessotto<sup>1,4,#</sup>, Amal Samir Saad Soliman Aljaabary<sup>1</sup>, Sergio M. Saldana<sup>1</sup>, Chunsheng Jin<sup>5</sup>, Niclas G. Karlsson<sup>5</sup>, Maura Grealy<sup>6</sup>, Markus M. Hilscher<sup>7</sup>, Fulvio Magni<sup>8</sup>, Clizia Chinello<sup>8</sup>, Michelle Kilcoyne<sup>1,9</sup> and Abhay Pandit<sup>1,\*</sup>*

<sup>1</sup>CÚRAM, SFI Research Centre for Medical Devices, National University of Ireland Galway, Ireland

<sup>2</sup>Neurobiology sector, International School for Advanced Studies (SISSA), Trieste, Italy

<sup>3</sup>Department of Medical Surgery and Health Science, University of Trieste, Trieste, Italy

<sup>4</sup>Department of Molecular Medicine, University of Padova, Italy

<sup>5</sup>Department of Medical Biochemistry, Institute of Biomedicine, Sahlgrenska Academy, University of Gothenburg, Gothenburg, Sweden

<sup>6</sup>Pharmacology and Therapeutics, School of Medicine, National University of Ireland Galway, Ireland

<sup>7</sup>Science for Life Laboratory, Department of Biochemistry and Biophysics, Stockholm University, Stockholm, Sweden

<sup>8</sup>Clinical Proteomics and Metabolomics Unit, School of Medicine and Surgery, University of Milano-Bicocca, Veduggio al Lambro, Italy

<sup>9</sup>Carbohydrate Signalling Group, Microbiology, School of Natural Sciences, National University of Ireland Galway, Galway, Ireland

\*Corresponding author e-mail: [abhay.pandit@nuigalway.ie](mailto:abhay.pandit@nuigalway.ie)

# These authors contributed equally

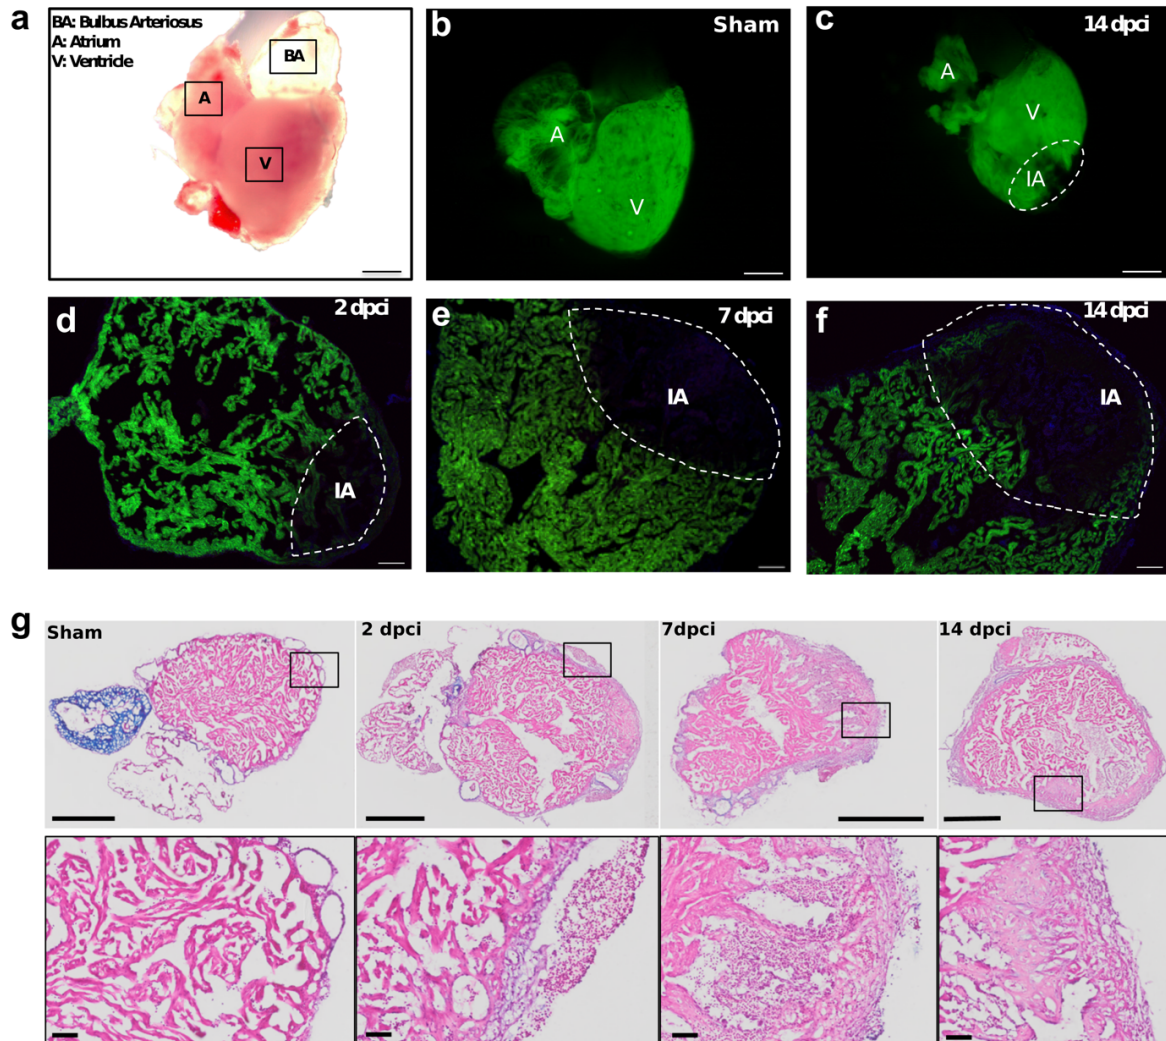

**Supplementary Figure 1. Cryoinjury-induced myocardial infarction in zebrafish heart.** **a** Whole-mount view of zebrafish heart showing the single atrium (A), ventricle (V) and the bulbus arteriosus (BA). **b** Whole uninjured (sham) and **c** 14 dpci hearts of transgenic zebrafish expressing GFP (Green Fluorescent Protein) under the control of cardiac specific promoter *cmIc-2* showing how the injured area (IA: encircled by dashed line) is devoid of GFP expression due to cardiomyocyte death. Scale bar 500  $\mu$ m. This is more evident in the cross-sections shown in **d** 2 dpci, **e** 7 dpci and **f** 14 dpci where is also possible to see how cardiomyocytes are repopulating the injured area. Scale bar 100  $\mu$ m. **g** Alcian blue staining in uninjured (sham) and cryo-injured (2 dpci, 7 dpci and 14 dpci) heart showing the fibrotic scar formation. Scale bar = 500  $\mu$ m and 50  $\mu$ m for the higher magnifications.

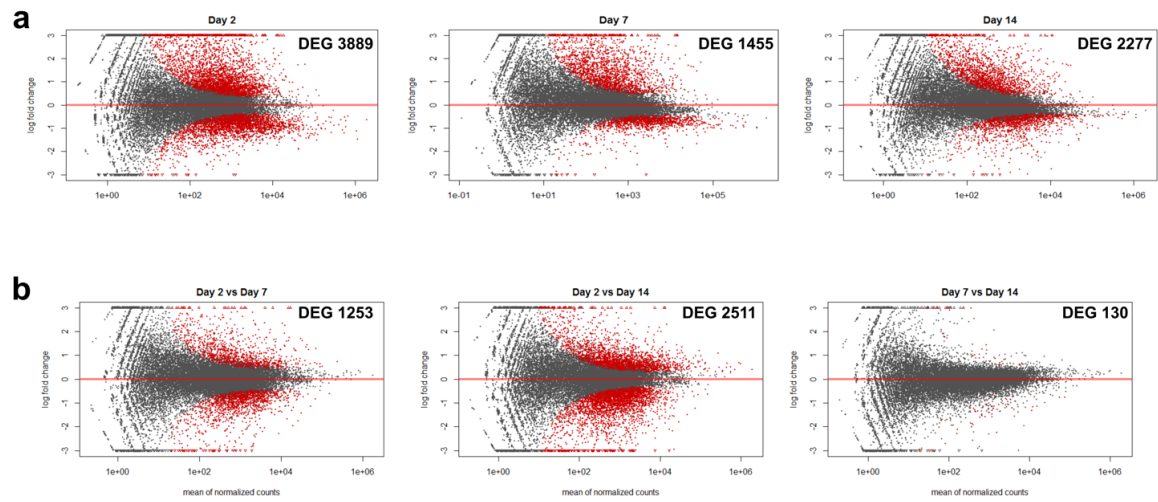

**Supplementary Figure 2. RNA-sequencing analysis on regenerating zebrafish heart. a** Volcano plots showing differentially expressed genes (DEG) at the different time points (2 days, 7 days and 14 days) after cryoinjury, and **b** 2 days vs 7 days, 2 days vs 14 days and 7 days vs 14 days. Red dots denote statistically significant DEG.

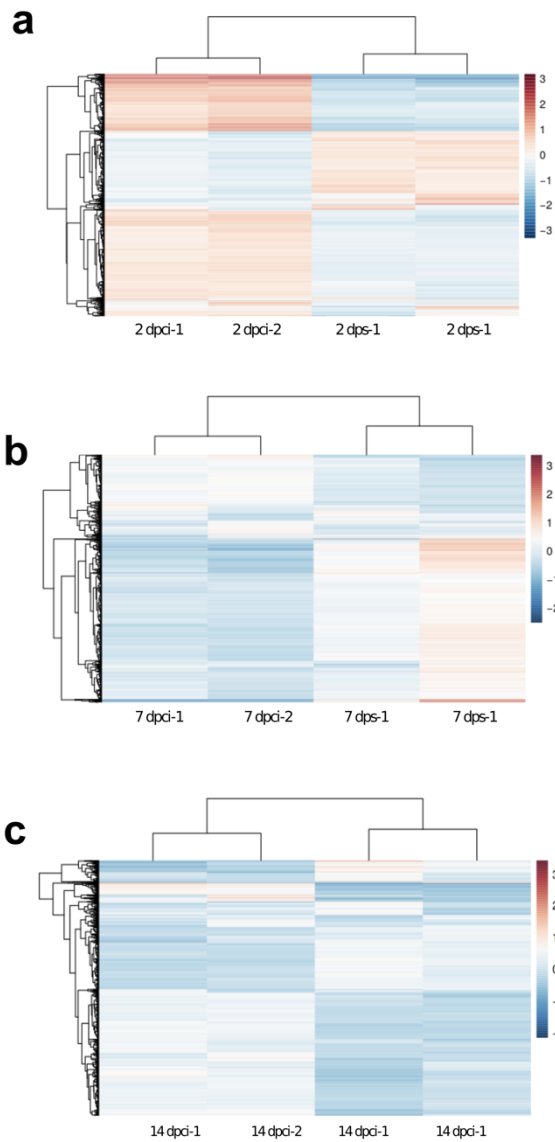

**Supplementary Figure 3. Differentially expressed genes clustering.** **a** Heatmap of the top 2000 differentially expressed genes (DEG) of the biological replicates 1 and 2 at 2 dpci, **b** 7 dpci and **c** 14 dpci compared with the corresponding controls dps (days post sham). DEG are located on each row, while columns represent the biological replicates. Cryoinjury replicates (dpci) cluster with each other, while the control replicates (dps) cluster together. Color intensity represents log<sub>2</sub> FC. Each biological replicate derives from the pooling of 4 different animals (n = 8).

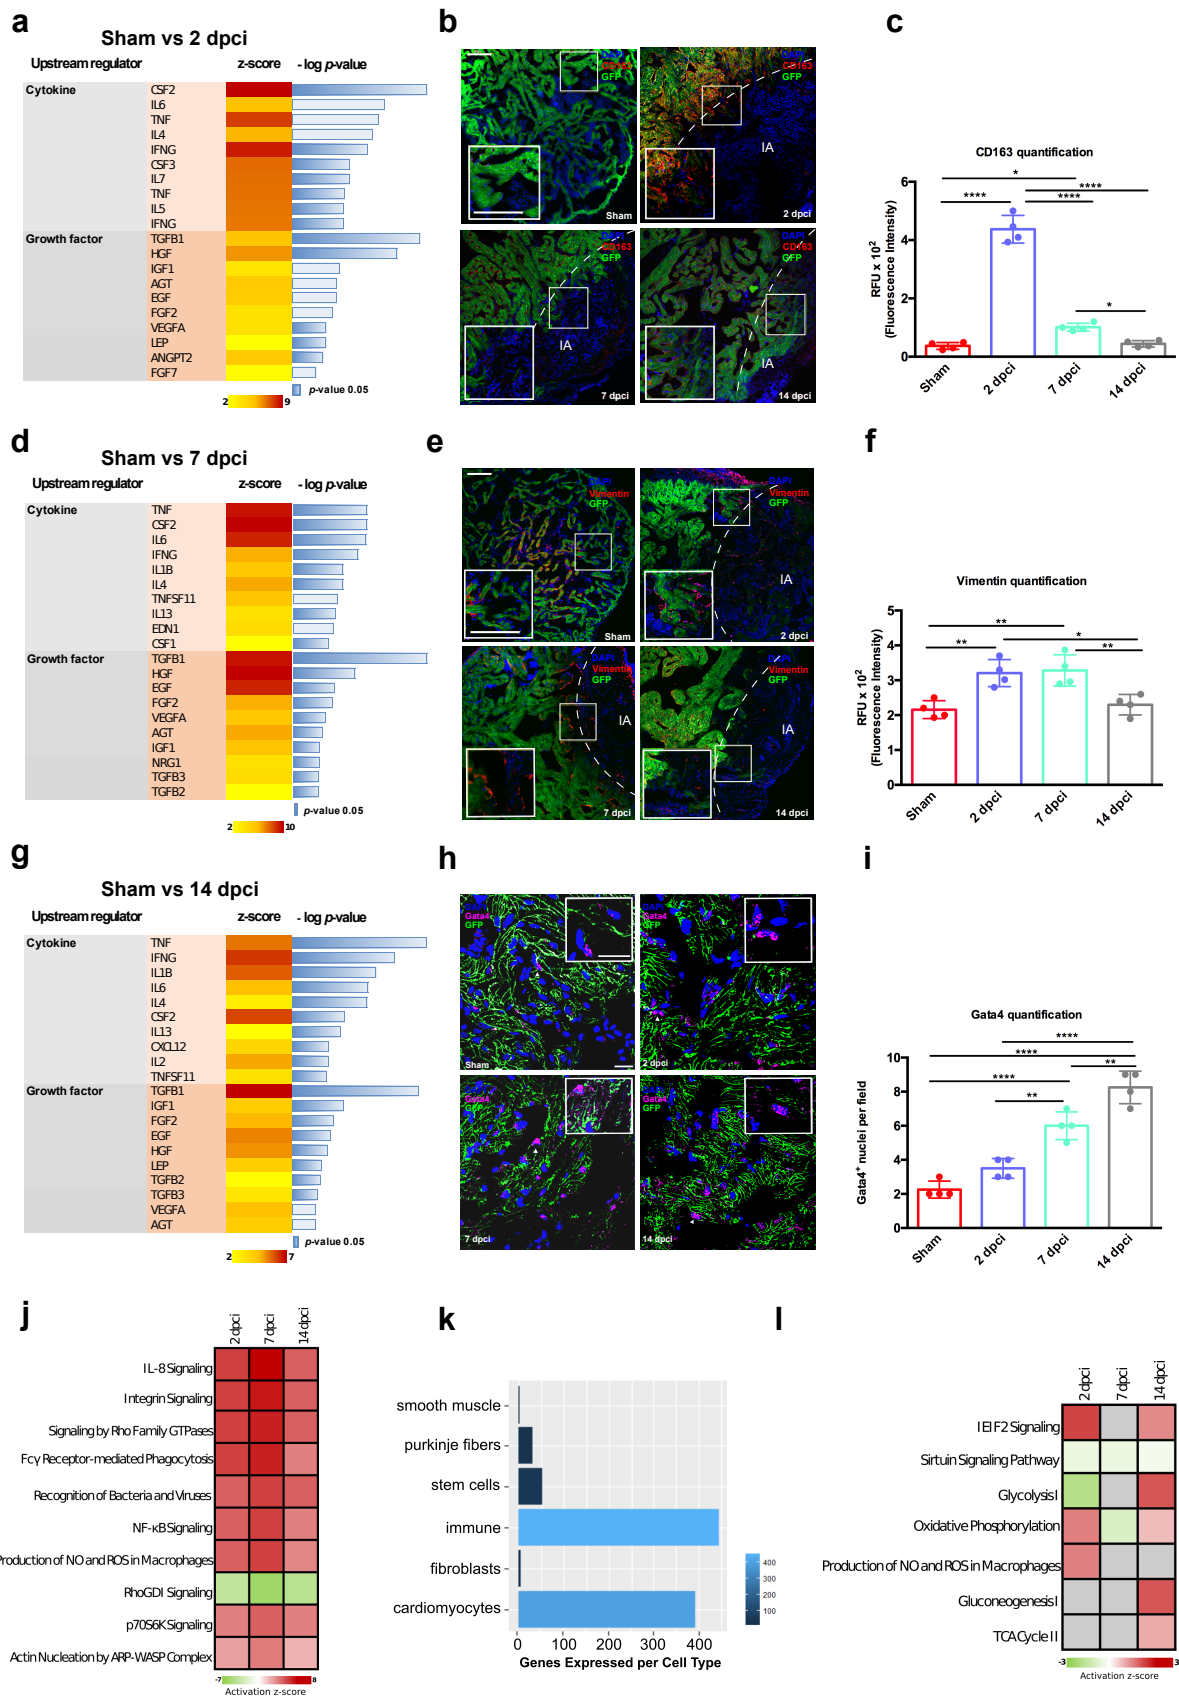

**Supplementary Figure 4. Upstream regulators at the different phases of regeneration. a**

Upstream regulators at 2 dpci obtained analysing the RNA-sequencing data and using the IPA® URA tool. The most significant cytokine and growth factors are shown according to their

-log( $p$ -value) and z-score. **b** Confocal images and **c** relative quantification showing CD163 expression in the Sham and following injury. Cardiomyocytes are identified by GFP positivity. Scale bar = 100  $\mu$ m. **d** Upstream regulators at 7 dpci identified as described in **a**. **e** Confocal images and **f** relative quantification showing vimentin expression in the Sham and following injury. **g** Upstream regulators at 14 dpci identified as described in **a**. **h** Confocal images and **i** relative quantification showing Gata4 expression in the Sham and following injury. Scale bar = 100  $\mu$ m. Scale bar = 10  $\mu$ m. ( $*p < 0.05$ ,  $**p < 0.01$ ,  $***p < 0.001$ ,  $****p < 0.0001$ ). Data are shown as mean with SD ( $n = 4$  animals per group). **j** Comparative analysis of the most significant pathways across the time points from RNA-seq data. **k** inference of cell type-proportions (RNA-seq deconvolution) obtained using the CellMapper package **l** Comparison analysis between the different time points of the most significant pathways identified using MS data. Two biological replicates deriving from the pooling of 4 different animals ( $n = 8$  animals per group) were analysed for RNA-seq and MS experiments.

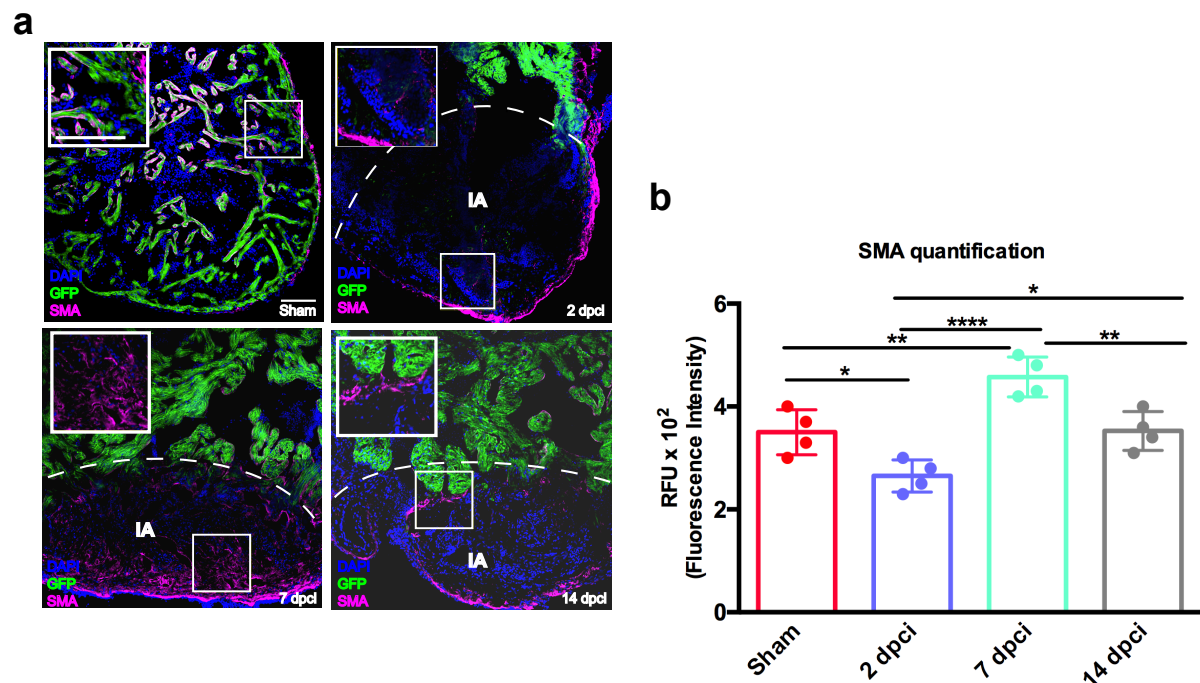

**Supplementary Figure 5. Smooth muscle actin expression during zebrafish heart regeneration.** **a** Confocal images and **b** relative quantification showing smooth muscle actin (SMA) expression in the Sham and following injury. Cardiomyocytes are identified by GFP positivity. Data are shown as mean with standard deviation (n = 4 animals per group). Scale bar = 100  $\mu$ m. (\* $p$  < 0.05, \*\* $p$  < 0.01, \*\*\* $p$  < 0.001, \*\*\*\* $p$  < 0.0001).

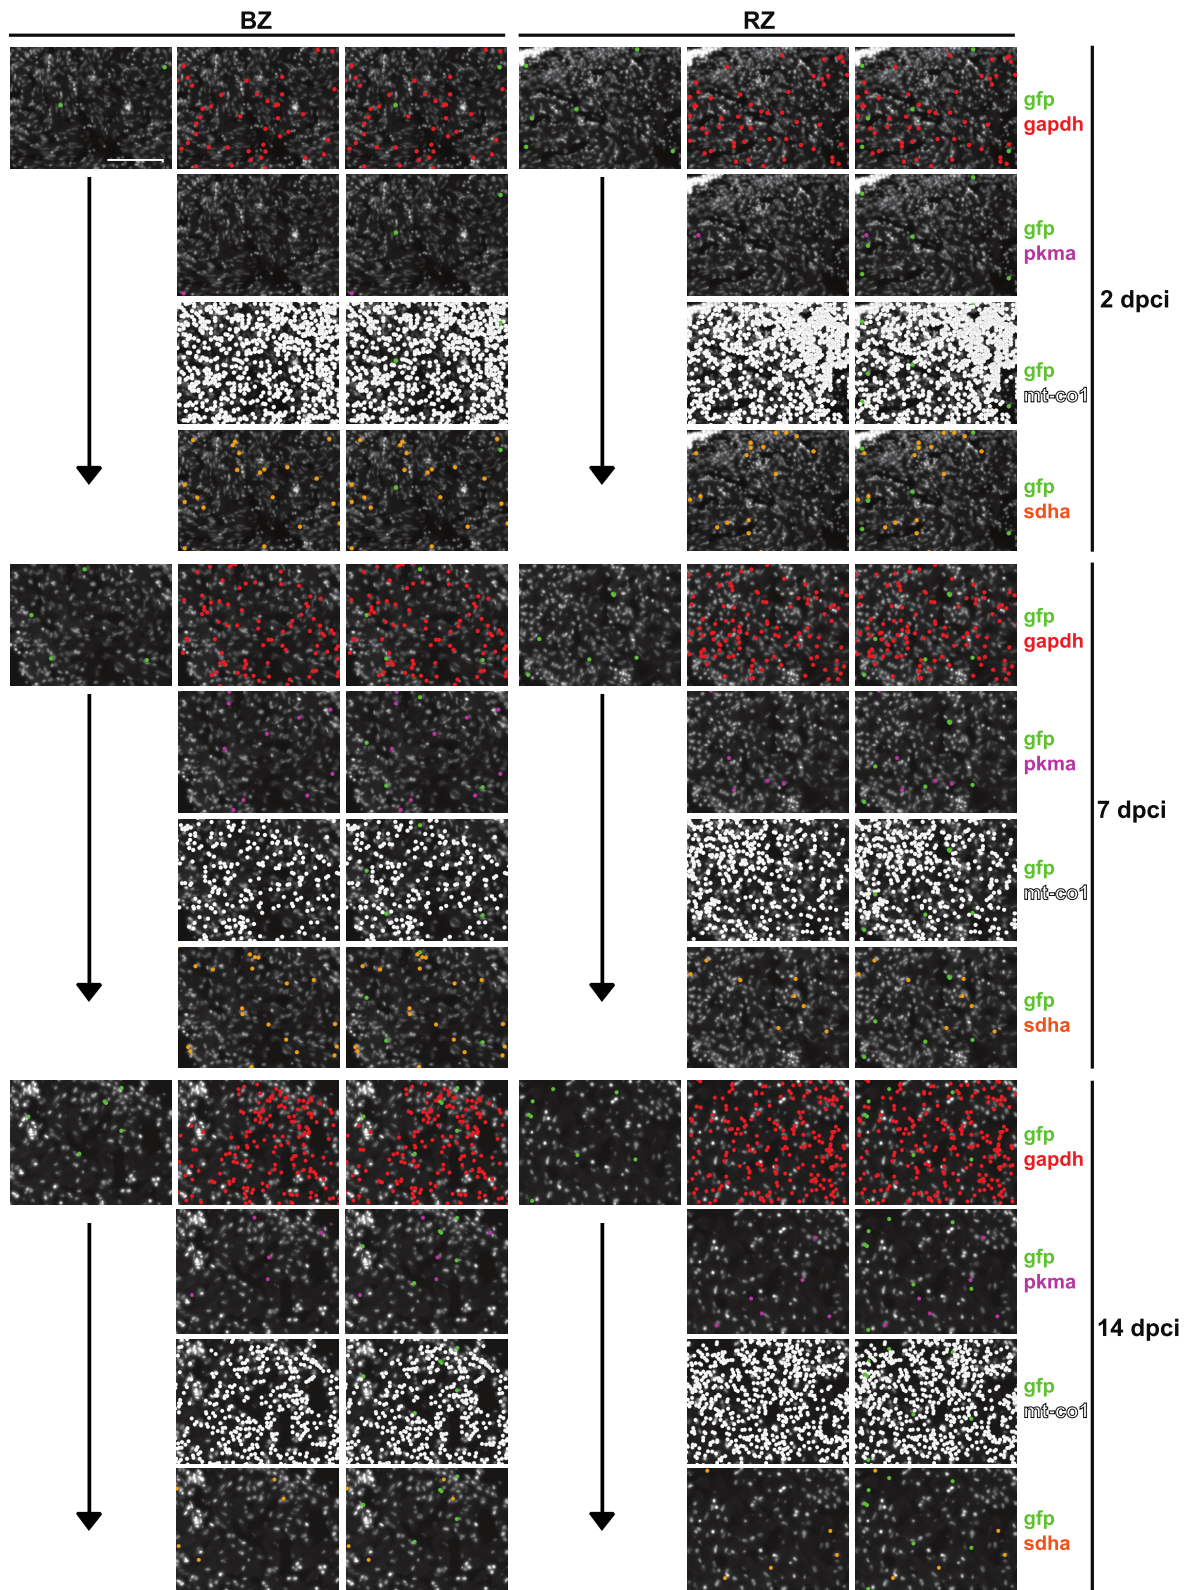

**Supplementary Figure 6. Cardiomyocyte targeted in situ sequencing.** Representative zoom in images of targeted multiplexed mRNA detection assay showing spatial distribution of spots identifying *gapdh*, *pkma*, *mt-co1* and *sdha* expression at 2, 7 and 14 dpi in the border and



remote zones. A transgenic zebrafish line, in which a green fluorescent protein (*gfp*) gene was inserted under the promoter of cardiomyocyte-specific gene cardiac myosin light chain 2 (*cm1c2*), was employed to identify cardiomyocytes. IA: injured area; BZ: border zone; RZ: remote zone. Scale bar = 100  $\mu\text{m}$ . Two biological replicates for each group were analysed.

**Supplementary Table 1** Most 25 significant GO terms from RNA-seq data at 2 dpci (days post cryoinjury).

| <b>ID</b>  | <b>TERM</b>                                                | <b>pValue</b> |
|------------|------------------------------------------------------------|---------------|
| GO:0005975 | carbohydrate metabolic process                             | 1.15E-09      |
| GO:0034314 | Arp2/3 complex-mediated actin nucleation                   | 1.22E-07      |
| GO:0007229 | integrin-mediated signaling pathway                        | 2.57E-07      |
| GO:0031101 | fin regeneration                                           | 1.96E-04      |
| GO:0006457 | protein folding                                            | 2.07E-04      |
| GO:0006508 | proteolysis                                                | 3.27E-04      |
| GO:0061077 | chaperone-mediated protein folding                         | 3.69E-04      |
| GO:0030593 | neutrophil chemotaxis                                      | 5.65E-04      |
| GO:0051603 | proteolysis involved in cellular protein catabolic process | 8.84E-04      |
| GO:0006487 | protein N-linked glycosylation                             | 0.00112       |
| GO:0071028 | nuclear mRNA surveillance                                  | 0.00146       |
| GO:0030225 | macrophage differentiation                                 | 0.00166       |
| GO:0034475 | U4 snRNA 3'-end processing                                 | 0.00472       |
| GO:0048385 | regulation of retinoic acid receptor signaling pathway     | 0.00472       |
| GO:0009617 | response to bacterium                                      | 0.00574       |
| GO:0015992 | proton transport                                           | 0.00574       |
| GO:0070098 | chemokine-mediated signaling pathway                       | 0.00674       |
| GO:0034427 | nuclear-transcribed mRNA catabolic process                 | 0.00725       |
| GO:0030833 | regulation of actin filament polymerization                | 0.00725       |
| GO:0043420 | anthranilate metabolic process                             | 0.00850       |
| GO:0019805 | quinolinate biosynthetic process                           | 0.00850       |
| GO:0007188 | adenylate receptor signaling pathway                       | 0.01179       |
| GO:0010501 | RNA secondary structure unwinding                          | 0.01377       |
| GO:0006935 | chemotaxis                                                 | 0.01584       |
| GO:0002430 | complement receptor mediated signaling pathway             | 0.01639       |

**Supplementary Table 2** Most 25 significant GO terms from RNA-seq data at 7 dpci.

| <b>ID</b>  | <b>TERM</b>                                                | <b>pValue</b> |
|------------|------------------------------------------------------------|---------------|
| GO:0005975 | carbohydrate metabolic process                             | 2.55E+06      |
| GO:0006954 | inflammatory response                                      | 2.68E+09      |
| GO:0006364 | rRNA processing                                            | 2.70E+09      |
| GO:0006457 | protein folding                                            | 3.42E+10      |
| GO:0002376 | immune system process                                      | 7.37E+09      |
| GO:0009617 | response to bacterium                                      | 1.03E+10      |
| GO:0034314 | Arp2/3 complex-mediated actin nucleation                   | 2.02E+11      |
| GO:0015031 | protein transport                                          | 2.41E+11      |
| GO:0051603 | proteolysis involved in cellular protein catabolic process | 5.54E+11      |
| GO:0042254 | ribosome biogenesis                                        | 1.35E+12      |
| GO:0006508 | proteolysis                                                | 1.78E+12      |
| GO:0006048 | UDP-N-acetylglucosamine biosynthetic process               | 1.90E+12      |
| GO:0045454 | cell redox homeostasis                                     | 3.85E+12      |
| GO:0030225 | macrophage differentiation                                 | 6.19E+11      |
| GO:0007229 | integrin-mediated signaling pathway                        | 6.78E+11      |
| GO:0042127 | regulation of cell proliferation                           | 0.00115       |
| GO:0045087 | innate immune response                                     | 0.00117       |
| GO:0031101 | fin regeneration                                           | 0.00133       |
| GO:0030833 | regulation of actin filament polymerization                | 0.00146       |
| GO:0030163 | protein catabolic process                                  | 0.00224       |
| GO:0035701 | hematopoietic stem cell migration                          | 0.00332       |
| GO:0032496 | response to lipopolysaccharide                             | 0.00340       |
| GO:0009611 | response to wounding                                       | 0.00347       |
| GO:0006487 | protein N-linked glycosylation                             | 0.00420       |
| GO:0043410 | positive regulation of MAPK cascade                        | 0.00612       |

**Supplementary Table 3** Most 25 significant GO terms from RNA-seq data at 14 dpci.

| <b>ID</b>  | <b>TERM</b>                                                | <b>pValue</b> |
|------------|------------------------------------------------------------|---------------|
| GO:0006364 | rRNA processing                                            | 1.15E-09      |
| GO:0042254 | ribosome biogenesis                                        | 1.22E-07      |
| GO:0051603 | proteolysis involved in cellular protein catabolic process | 2.57E-07      |
| GO:0006457 | protein folding                                            | 1.96E-04      |
| GO:0015031 | protein transport                                          | 2.07E-04      |
|            | maturation of SSU-rRNA from tricistronic rRNA              |               |
| GO:0000462 | transcript                                                 | 3.27E-04      |
| GO:0009617 | response to bacterium                                      | 3.69E-04      |
| GO:0005975 | carbohydrate metabolic process                             | 5.65E-04      |
| GO:0051028 | mRNA transport                                             | 8.84E-04      |
| GO:0000398 | mRNA splicing, via spliceosome                             | 0.00112       |
| GO:0031101 | fin regeneration                                           | 0.00146       |
| GO:0006606 | protein import into nucleus                                | 0.00166       |
| GO:0006406 | mRNA export from nucleus                                   | 0.00472       |
| GO:0043248 | proteasome assembly                                        | 0.00472       |
| GO:0045899 | positive regulation of RNA polymerase II                   | 0.00574       |
| GO:0034314 | Arp2/3 complex-mediated actin nucleation                   | 0.00574       |
| GO:0042127 | regulation of cell proliferation                           | 0.00674       |
| GO:0042273 | ribosomal large subunit biogenesis                         | 0.00725       |
| GO:0002376 | immune system process                                      | 0.00725       |
| GO:0006508 | proteolysis                                                | 0.00850       |
| GO:0010501 | RNA secondary structure unwinding                          | 0.00850       |
| GO:0045454 | cell redox homeostasis                                     | 0.01179       |
| GO:0045087 | innate immune response                                     | 0.01377       |
| GO:0030833 | regulation of actin filament polymerization                | 0.01584       |
| GO:0006487 | protein N-linked glycosylation                             | 0.01639       |

**Supplementary Table 4** Literature summary of the most recent publications with RNA-seq datasets in zebrafish' cryoinjury model and comparison with our results.

| Aim                                                                                                                                                                                                                                   | Model and/or fish strain | Early post-injury stage (from 0 to 6dpi)                                                                                                                                                                                          | Mid-term post injury (from 7dpi to 13pi)                                                                     | Long-term remodelling (from 14 dpi)                                                  | Comparison with our results                                                                                                                                                                                         | Ref               |
|---------------------------------------------------------------------------------------------------------------------------------------------------------------------------------------------------------------------------------------|--------------------------|-----------------------------------------------------------------------------------------------------------------------------------------------------------------------------------------------------------------------------------|--------------------------------------------------------------------------------------------------------------|--------------------------------------------------------------------------------------|---------------------------------------------------------------------------------------------------------------------------------------------------------------------------------------------------------------------|-------------------|
| Computational analysis of published ablation model datasets to select 15 candidate genes with potential role on heart regeneration; Comparison with a cryoinjured dataset at 5 timepoints: control, 1, 3, 5 and 7 day after operation | WIK wild-type fish       | NA                                                                                                                                                                                                                                | NA                                                                                                           | NA                                                                                   | Limited amount of data since only 15 candidate genes were analysed. The computational comparison showed concordance across two different models at 1 and 3 dpi, but there is no comparison between timepoints.      | 2014 <sup>1</sup> |
| Generation and integration of a co-expression network of heart regeneration in zebrafish.                                                                                                                                             | Wild type                | Massive cell death from 4hpi; Lack of cardiomyocytes and fibrotic scar formation at 3dpi; Enrichment of genes implicated in energy metabolism, amino-acid biosynthesis and DNA replication, which may suggest cell proliferation, | Boost of regeneration at 7 dpi (enrichment in peptidase activity, DNA metabolism and replication enrichment) | No differences can be detected at 90 dpi with controls since remodelling is complete | As in our group, the largest numbers of differentially-expressed genes were detected at the early stages of regeneration. Authors performed a longer time-depended assess at 4 hours (hpi), 1, 3, 7, 14 and 90 dpi. | 2016 <sup>2</sup> |

|                                                                                                                                                                                                               |                                                                                                                                                                                                                                                                                                                                                                                                                                                                                                                     |           |                                      |                                                                                                                                |                                                                                                                                                                                                                                                                                                                                                                                                                                                                                   |                         |
|---------------------------------------------------------------------------------------------------------------------------------------------------------------------------------------------------------------|---------------------------------------------------------------------------------------------------------------------------------------------------------------------------------------------------------------------------------------------------------------------------------------------------------------------------------------------------------------------------------------------------------------------------------------------------------------------------------------------------------------------|-----------|--------------------------------------|--------------------------------------------------------------------------------------------------------------------------------|-----------------------------------------------------------------------------------------------------------------------------------------------------------------------------------------------------------------------------------------------------------------------------------------------------------------------------------------------------------------------------------------------------------------------------------------------------------------------------------|-------------------------|
| <p>Study of collagen-producing cells subpopulations and their fate after zebrafish myocardium regeneration using different transgenic strains that present a genetic ablation of collagen producing cells</p> | <p>Tg(postnb:citrine)<sup>cn6</sup>;<br/> Tg(periostin:CreERT<sup>2</sup>)<sup>cn7</sup>;<br/> Tg(col1a2:loxPtagBFP-loxP-mCherry-NTR)<sup>cn8</sup>;<br/> Tg(col1a2:loxP-mCherry-NTR)<sup>cn11</sup>; Tg(fli1a:CreERT2)<sup>cn9</sup>;<br/> Tg(kdrl:mcherry);<br/> Tg(-3.5ubb:loxP-loxP-eGFP)<sup>cz1702Tg</sup>;<br/> Tg(ubb:Switch)<sup>cz1701</sup>;<br/> Tg(ubb:mCherry)<sup>cz1705Tg</sup>;<br/> Tg(fli1a:GFP)<sup>y1</sup>;Tg1(-6.8wt1a:EGFP)<sup>li7Tg</sup><br/> and Tg(tcf21:CreERT2)<sup>pd42Tg</sup></p> | <p>NA</p> | <p>ECM genes upregulated at 7dpi</p> | <p>Decrease in ECM gene expression at 60 dpi<br/> there were also collagen-encoding genes that were up-regulated at 60 dpi</p> | <p>Focused on ECM production and accumulation during zebrafish remodelling after cryoinjury.<br/> Study of the gene expression at day 7 and 60 dpi, and comparison with the uninjured expression.<br/> At 7dpi the upregulated pathways such as “Hepatic Fibrosis/Hepatic Stellate Cell Activation”, “Leukocyte Extravasation Signalling” or “Axonal Guidance Signalling”, are consistent with our data. However, authors sorted cell populations before the RNAseq analysis.</p> | <p>2018<sup>3</sup></p> |
|---------------------------------------------------------------------------------------------------------------------------------------------------------------------------------------------------------------|---------------------------------------------------------------------------------------------------------------------------------------------------------------------------------------------------------------------------------------------------------------------------------------------------------------------------------------------------------------------------------------------------------------------------------------------------------------------------------------------------------------------|-----------|--------------------------------------|--------------------------------------------------------------------------------------------------------------------------------|-----------------------------------------------------------------------------------------------------------------------------------------------------------------------------------------------------------------------------------------------------------------------------------------------------------------------------------------------------------------------------------------------------------------------------------------------------------------------------------|-------------------------|

|                                                                                          |                 |                                        |                                                                                                                                                                                                    |                                                                                                                                                                                                           |                                                                                                                                                                                                                                                                                                                                                                                                                  |                   |
|------------------------------------------------------------------------------------------|-----------------|----------------------------------------|----------------------------------------------------------------------------------------------------------------------------------------------------------------------------------------------------|-----------------------------------------------------------------------------------------------------------------------------------------------------------------------------------------------------------|------------------------------------------------------------------------------------------------------------------------------------------------------------------------------------------------------------------------------------------------------------------------------------------------------------------------------------------------------------------------------------------------------------------|-------------------|
| Dynamic transcriptome response monitoring of mRNA and microRNA in zebrafish at 1–160 dpi | Adult wild type | Increase of regeneration at 1 and 4dpi | Largest peaks of differentially expressed genes compared to controls were found at 4 and 7dpi. Using GO gene sets, and enrichment in proliferation, in immune response and migration was reported. | From 14dpi an enrichment in DNA packaging, ECM organization and cell adhesion reported;<br><br>From 60dpi authors reported an enrichment in cardiovascular development, heart contraction and cell growth | Spatio-temporal resolution of the mRNAs during heart regeneration at different stages after injury. Focused on the identification of miRNA-mRNA interactions to described potential therapeutic targets for MI. Similar results related to cell proliferation enrichment during the first 2 weeks after the injury.<br><br>No linkage assessed within the metabolic stage and glycosylation during regeneration. | 2018 <sup>4</sup> |
|------------------------------------------------------------------------------------------|-----------------|----------------------------------------|----------------------------------------------------------------------------------------------------------------------------------------------------------------------------------------------------|-----------------------------------------------------------------------------------------------------------------------------------------------------------------------------------------------------------|------------------------------------------------------------------------------------------------------------------------------------------------------------------------------------------------------------------------------------------------------------------------------------------------------------------------------------------------------------------------------------------------------------------|-------------------|

|                                                                                                                                                                                                                                                                        |                                                                                                                                                                                                                                                                                                                                                                                                                                   |    |    |    |                                                                                                                                                                                                                                                                                                                                                                               |                   |
|------------------------------------------------------------------------------------------------------------------------------------------------------------------------------------------------------------------------------------------------------------------------|-----------------------------------------------------------------------------------------------------------------------------------------------------------------------------------------------------------------------------------------------------------------------------------------------------------------------------------------------------------------------------------------------------------------------------------|----|----|----|-------------------------------------------------------------------------------------------------------------------------------------------------------------------------------------------------------------------------------------------------------------------------------------------------------------------------------------------------------------------------------|-------------------|
| Single-cell RNA-seq analysis to explore the differential mechanisms between non-proliferating and proliferating cardiomyocytes                                                                                                                                         | Tupfel Long Fin (TL); Tg( <i>myl7:dsRED</i> ) <sup>s879Tg</sup> ; Tg( <i>myl7:GFP</i> ) <sup>twu34Tg</sup> ; Tg( <i>phd3:GFP</i> ) <sup>sh144</sup> ; Tg( <i>gata4:EGFP</i> ) <sup>ae1</sup> ; TgBAC( <i>nppa:mCitrine</i> )<br>And<br>Tg( <i>cmlc2:CreER</i> ) <sup>pd10</sup> x Tg( $\beta$ -act2:BSNrg1) <sup>pd107</sup> hearts; Tg( <i>gata4:EGFP</i> ) <sup>ae1</sup> hearts; Tg( <i>phd3:GFP</i> ) <sup>sh144</sup> hearts | NA | NA | NA | Consistency with our results related to a metabolic shift in adult cardiomyocytes from OXPHOS to glycolysis during heart regeneration. From a mechanistic point of view, authors confirmed by blocking Nrg1/ErbB2 signaling, their pivotal role in the metabolic reprogramming. No differential analysis and comparison performed over different timepoints after cryoinjury. | 2019 <sup>5</sup> |
| Study of cardiomyocyte proliferation after injury in adult zebrafish through metabolic reprogramming from a mechanistic point of view by the manipulation of pyruvate metabolism using Pdk3 as well as a catalytic subunit of the pyruvate dehydrogenase complex (PDC) | <i>Tg(cryaa:DsRed,-5.1myl7:CreERT2)</i> <sup>pd10</sup> ; <i>pkma2</i> <sup>s717</sup> ; <i>pkmb</i> <sup>s718</sup> ; and <i>ppargc1a</i> <sup>bns176</sup> ; <i>Tg(cryaa:Cerulean,hsp70l:LOXP-STOP-LOXP-pdha1aSTA-T2A-mCherry)</i> <sup>bns343</sup> ; <i>Tg(cryaa:Cerulean,hsp70l:LOXP-STOP-LOXP-pdk3b-T2A-mCherry)</i> <sup>bns344</sup>                                                                                      | NA | NA | NA | Mechanistic analysis of glycolysis by Pdk3 which seems to promote cardiomyocyte dedifferentiation after injury. However only on timepoint at 5dpci was used. Consistency in the results about the metabolic shift from OXPHOS to glycolysis. Authors reported a reduction in mitochondrial gene expression that                                                               | 2020 <sup>6</sup> |



|                                                                                                                                                                                                          |                                                                                                                                                                                                                                                                                                                                                                                         |                                                                                               |                                                                                                                  |                                                    |                                                                                                                                                                                                                                                                                             |                   |
|----------------------------------------------------------------------------------------------------------------------------------------------------------------------------------------------------------|-----------------------------------------------------------------------------------------------------------------------------------------------------------------------------------------------------------------------------------------------------------------------------------------------------------------------------------------------------------------------------------------|-----------------------------------------------------------------------------------------------|------------------------------------------------------------------------------------------------------------------|----------------------------------------------------|---------------------------------------------------------------------------------------------------------------------------------------------------------------------------------------------------------------------------------------------------------------------------------------------|-------------------|
|                                                                                                                                                                                                          |                                                                                                                                                                                                                                                                                                                                                                                         |                                                                                               |                                                                                                                  |                                                    | indicates lower mitochondrial activity, and thereby reduced OXPHOS during regeneration.                                                                                                                                                                                                     |                   |
| Study of the transcriptome during heart regeneration, with a focus on the role of the suppression of transcription factor Tp53 associated genes.                                                         | Wild-type or transgenic zebrafish of the EK/AB strain<br><i>β-actin2:loxp-mCherry-STOP-loxp-DTA</i> <sup>pd36</sup> ; <i>β-actin2:loxp-mTagBFP-STOP-loxp-nrg1</i> <sup>pd107</sup> ;<br><i>β-actin2:loxp-mTagBFP-STOP-loxp-vegfaa</i> <sup>pd262</sup> ; <i>cmlc2:CreER</i> <sup>pd10</sup> ;<br><i>gata4:EGFP</i> ; <i>gata4:dsRed2</i> <sup>pd28</sup> ; <i>tp53</i> <sup>M214K</sup> | NA                                                                                            | High index of cardiomyocyte proliferation at 7dpi,<br><br>Downstream of the Tp53 transcriptional network at 7dpi | High index of cardiomyocyte proliferation at 14dpi | Upstream regulation of factors involved in inflammation such as TNF-α and IL-6, as reported in our work. Results of earlier timepoints after injury not available. Mechanistic asses of Tp53 role in cardiomyocyte differentiation and division after cryoinjury by its suppression by mdm2 | 2020 <sup>7</sup> |
| Study of macrophage response in zebrafish, as well as a comparison between neonatal and adult conditions of heart repair in mice proving their role in fibrosis and scar formation in the injured heart. | Wild type, <i>TgBAC(mpeg1:BirA-Citrine)</i> <sup>ox122</sup> ; <i>Tg(βactin:Avi-Cerulean-RanGap)</i> <sup>ct700a</sup> ;<br><i>TgBAC(mpeg1:BirA-Citrine;βactin:Avi-Cerulean-Rangap)</i> <sup>ox133</sup> ;<br><i>Gt(foxd3Citrine)</i> <sup>ct110</sup> ;<br><i>Tg(mpeg1:EGFP)</i> <sup>gl22</sup> ; <i>Tg(mpeg1:mCherry)</i> <sup>gl23</sup>                                            | Increased macrophage infiltration at 1dpi; genes related to inflammatory response upregulated | From 5dpi upregulation of genes related to regeneration                                                          | Resolution of inflammation by 14dpi                | The experimental design focused on the study of macrophages transcriptome at 1dpi, 5dpi and 14dpi, and the comparison with the resection model. Authors proved the role of macrophages in the scar formation and remodelling.                                                               | 2020 <sup>8</sup> |

**Supplementary Table 5** List of lectins printed on the microarray.

| <b>Lectin source</b>             | <b>Abbreviation</b> | <b>Binding specificity</b>                                                   |
|----------------------------------|---------------------|------------------------------------------------------------------------------|
| <i>Artocarpus integrifolia</i>   | AIA                 | Gal, Gal- $\beta$ -(1,3)-GalNAc                                              |
| <i>Robinia pseudoacacia</i>      | RPbAI               | Gal, GalNAc                                                                  |
| <i>Sambucus nigra</i>            | SNA-II              | Gal, GalNAc                                                                  |
| <i>Sophora japonica</i>          | SJA                 | $\beta$ - GalNAc                                                             |
| <i>Dolichos biflorus</i>         | DBA                 | GalNAc                                                                       |
| <i>Glechoma hederacea</i>        | GHA                 | GalNAc                                                                       |
| <i>Glycine max</i>               | SBA                 | GalNAc                                                                       |
| <i>Vicia villosa</i>             | VVA                 | GalNAc                                                                       |
| <i>Bauhinia purpurea</i>         | BPA                 | GalNAc/Gal                                                                   |
| <i>Wisteria floribunda</i>       | WFA                 | GalNAc/sulfated GalNAc                                                       |
| <i>Helix pomatia</i>             | HPA                 | $\alpha$ -GalNAc                                                             |
| <i>Griffonia simplicifolia</i>   | GSL-I-A4            | $\alpha$ -GalNAc                                                             |
| <i>Amarantus caudatus</i>        | ACA                 | Sialylated Gal- $\beta$ -(1,3)-GalNAc                                        |
| <i>Agaricus bisporus</i>         | ABL                 | Gal- $\beta$ -(1,3)-GalNAc, GlcNAc                                           |
| <i>Arachis hypogaea</i>          | PNA                 | Gal- $\beta$ -(1,3)-GalNAc                                                   |
| <i>Griffonia Simplicifolia</i>   | GSL-II              | GlcNAc                                                                       |
| <i>Triticum vulgare</i>          | sWGA                | GlcNAc                                                                       |
| <i>Datura Stramonium</i>         | DSA                 | GlcNAc                                                                       |
| <i>Solanum tuberosum</i>         | STA                 | GlcNAc oligomers                                                             |
| <i>Lycopersicon esculentum</i>   | LEL                 | GlcNAc- $\beta$ -(1,4)- GlcNAc                                               |
| <i>Calystegia sepium</i>         | Calsepa             | Man/Maltose                                                                  |
| <i>Narcissus pseudonarcissus</i> | NPA                 | $\alpha$ -(1,6)-Man                                                          |
| <i>Galanthus nivalis</i>         | GNA                 | Man- $\alpha$ -(1,3)-                                                        |
| <i>Hypochaeris glabra</i>        | HHA                 | Man- $\alpha$ -(1,3)- Man- $\alpha$ -(1,6)-                                  |
| <i>Canavalia ensiformis</i>      | ConA                | $\alpha$ -linked Man, Glc, GlcNAc                                            |
| <i>Lens culinaris</i>            | Lch-B               | Man, core fucosylated, agalactosylated biantennary N-glycans                 |
| <i>Lens culinaris</i>            | Lch-A               | Man/Glc                                                                      |
| <i>Pisum sativum</i>             | PSA                 | Man, core fucosylated trimannosyl N-glycans                                  |
| <i>Trichosanthes japonica</i>    | TJA-I               | Sialic acid- $\alpha$ -(2,6)-Gal- $\beta$ (1-4)-GlcNAc                       |
| <i>Triticum vulgare</i>          | WGA                 | NeuAc/GlcNAc                                                                 |
| <i>Maackia amurensis</i>         | MAA                 | Sialic acid- $\alpha$ -(2,3)-Gal(NAc)                                        |
| <i>Sambucus nigra</i>            | SNA-I               | Sialic acid- $\alpha$ -(2,6)-Gal(NAc)                                        |
| <i>Cancer antennarius</i>        | CCA                 | O-acetylated sialic acids                                                    |
| <i>Phaseolus vulgaris</i>        | PHA-L               | tri-/tetra-antennary $\beta$ -Gal/Gal- $\beta$ -(1,4)-GlcNAc                 |
| <i>Phaseolus vulgaris</i>        | PHA-E               | biantennary, bisecting GlcNAc, $\beta$ -Gal/Gal- $\beta$ -(1,4)-GlcNAc       |
| <i>Ricinus communis</i>          | RCA-I/120           | Gal- $\beta$ -(1,4)-GlcNAc                                                   |
| <i>Arum maculatum</i>            | AMA                 | Man                                                                          |
| <i>Cicer arietinum</i>           | CPA                 | Complex oligosaccharides                                                     |
| <i>Caragana arborescens</i>      | CAA                 | Gal- $\beta$ -(1,4)-GlcNAc                                                   |
| <i>Erythrina cristagalli</i>     | ECA                 | Gal- $\beta$ -(1,4)-GlcNAc oligomers                                         |
| <i>Trichosanthes japonica</i>    | TJA-II              | Fuc- $\alpha$ -(1-2)-Gal                                                     |
| <i>Aleuria aurantia</i>          | AAL                 | Fuc- $\alpha$ -(1,6)- and Fuc- $\alpha$ -(1,3)- linked                       |
| <i>Lotus tetragonolobus</i>      | LTA                 | Fuc- $\alpha$ -(1,3)-, Fuc- $\alpha$ -(1,6)- and Fuc- $\alpha$ -(1,2)-linked |
| <i>Ulex europaeus</i>            | UEA-I               | Fuc- $\alpha$ -(1,2)-linked                                                  |
| <i>Pseudomonas aeruginosa</i>    | PA-I                | Gal, Gal derivatives                                                         |
| <i>Euonymus europaeus</i>        | EEA                 | Terminal $\alpha$ -linked Gal                                                |
| <i>Griffonia simplicifolia</i>   | GSL-I-B4            | Terminal $\alpha$ -linked Gal                                                |
| <i>Maclura pomifera</i>          | MPA                 | Terminal $\alpha$ -linked Gal                                                |
| <i>Marasmius oreades</i>         | MOA                 | Terminal $\alpha$ -linked Gal                                                |

## Supplementary references

1. Rodius, S. *et al.* Transcriptional response to cardiac injury in the zebrafish: systematic identification of genes with highly concordant activity across in vivo models. *BMC Genomics* **15**, 852 (2014).
2. Rodius, S. *et al.* Analysis of the dynamic co-expression network of heart regeneration in the zebrafish. *Sci Rep* **6**, 26822 (2016).
3. Sánchez-Iranzo, H. *et al.* Transient fibrosis resolves via fibroblast inactivation in the regenerating zebrafish heart. *Proc Natl Acad Sci U S A* **115**, 4188–4193 (2018).
4. Klett, H. *et al.* Delineating the Dynamic Transcriptome Response of mRNA and microRNA during Zebrafish Heart Regeneration. *Biomolecules* **9**, (2018).
5. Honkoop, H. *et al.* Single-cell analysis uncovers that metabolic reprogramming by ErbB2 signaling is essential for cardiomyocyte proliferation in the regenerating heart. *Elife* **8**, (2019).
6. Fukuda, R. *et al.* Stimulation of glycolysis promotes cardiomyocyte proliferation after injury in adult zebrafish. *EMBO Rep* **21**, e49752 (2020).
7. Shoffner, A., Cigliola, V., Lee, N., Ou, J. & Poss, K. D. Tp53 Suppression Promotes Cardiomyocyte Proliferation during Zebrafish Heart Regeneration. *Cell Rep* **32**, 108089 (2020).
8. Simões, F. C. *et al.* Macrophages directly contribute collagen to scar formation during zebrafish heart regeneration and mouse heart repair. *Nat Commun* **11**, 600 (2020).
